# Supplementary material
Source: publisher figshare collection journal article supplement (https://gsapubs.figshare.com/ndownloader/files/23296595)
Supplement: Supplementary file 1 [file 23296595]

# **gSA DATA REPOSITORY 2014037**

**Mángano, Buatois, Astini and Rindsberg– Intertidal trilobite trace fossils - List of supplementary materials:**

Sup. Mat. 1. Figure DR1. Desiccation cracks in tidal-flat deposits of the Rome Formation.

Sup. Mat. 2. Table DR1. Selected occurrences of trilobite trace fossils in intertidal deposits

References

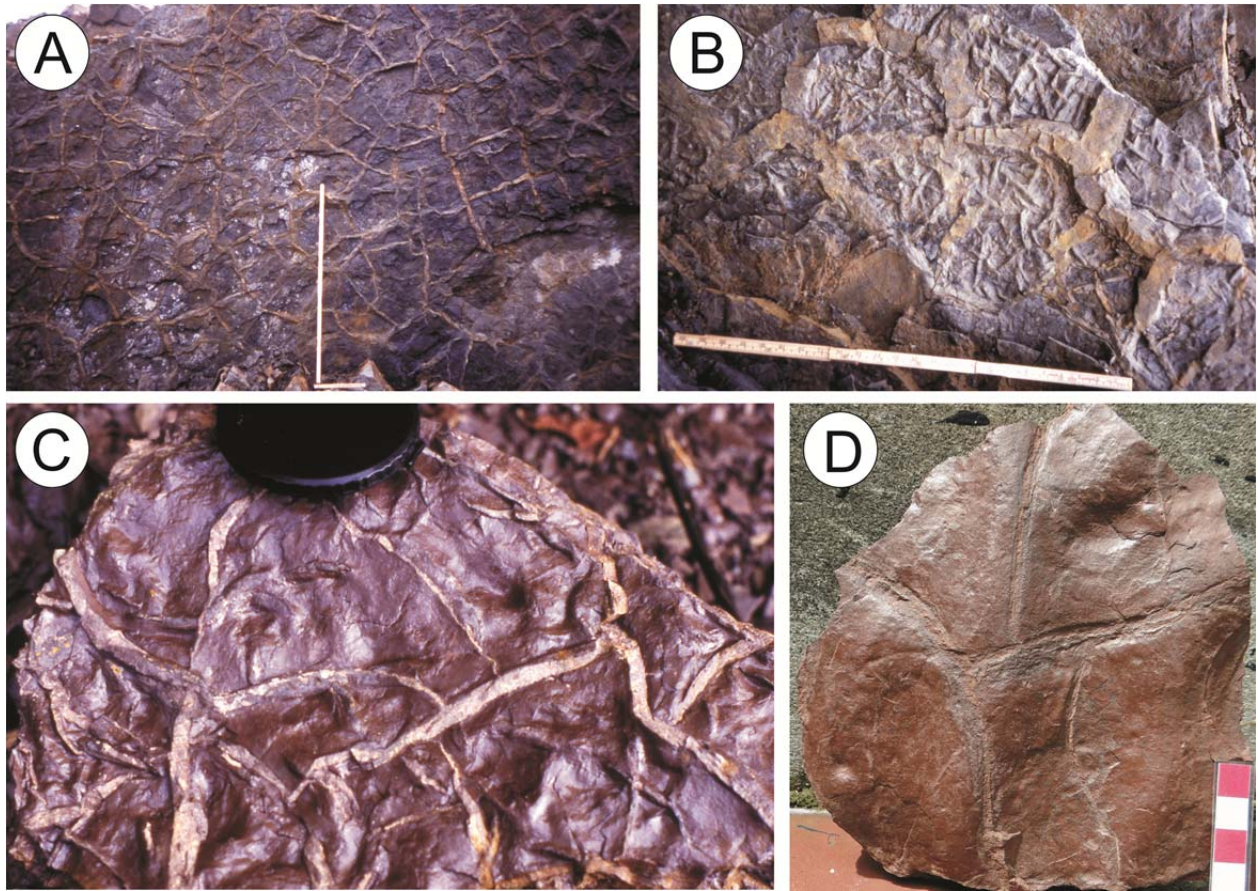

Figure DR1. Desiccation cracks in tidal-flat deposits of the Rome Formation. A. General view. B. Close-up showing several generations of desiccation cracks. C. Close-up showing morphological details and orthogonal angles. Lens cap is 5.5 cm wide. D. Desiccation cracks overprinting ripple surface. Scale bar is 2 cm long. Desiccation cracks in are V-shaped in cross section and displays connected rectilinear polygonal patterns in plane view. Recurrent desiccation cracks of incremental sizes suggest increased dehydration of the cohesive substrate due to progressively more prolonged exposures during neap-spring cycles.

| AGE                                    | TRACE FOSSILS                                                                                                                                                                                                                                                                                                                                                     | SEDIMENTOLOGIC CHARACTERISTICS                                                                                                                                                                           | SEDIMENTARY ENVIRONMENT                                                       | UNIT                                                                 | COMMENTS                                                                                                                | REFERENCE                                                                                               |
|----------------------------------------|-------------------------------------------------------------------------------------------------------------------------------------------------------------------------------------------------------------------------------------------------------------------------------------------------------------------------------------------------------------------|----------------------------------------------------------------------------------------------------------------------------------------------------------------------------------------------------------|-------------------------------------------------------------------------------|----------------------------------------------------------------------|-------------------------------------------------------------------------------------------------------------------------|---------------------------------------------------------------------------------------------------------|
| Cambrian Stages 2 to 3                 | <i>Cruziana brannae</i> , <i>C. fasciculata</i> , <i>C. plicata</i> , <i>C. pormensis</i> , <i>Cruziana</i> isp., <i>Diplichnites</i> isp., <i>Monomorphichnus lineatus</i> , <i>Monomorphichnus</i> isp., <i>Rusophycus bonnarensis</i> , <i>R. carinatus</i> , <i>R. cerecedensis</i> , <i>R. leonensis</i> , <i>R. transversensis</i> , <i>Rusophycus</i> isp. | Heterolithic facies. Flaser, wavy and lenticular bedding. Herringbone cross-stratification, desiccation cracks, planar cross-bedding, current and wave ripple cross-lamination, and parallel lamination. | Lower intertidal sand flat to upper intertidal mud flat and tidal channels    | Herrería Formation (Spain)                                           |                                                                                                                         | Crimes et al. (1977)                                                                                    |
| Cambrian Stages 2 to 3                 | <i>Monomorphichnus lineatus</i> , <i>Monomorphichnus</i> isp., <i>Rusophycus</i> isp.                                                                                                                                                                                                                                                                             | Heterolithic facies. Flaser, wavy and lenticular bedding. Herringbone cross-stratification, desiccation cracks, planar cross-bedding, current and wave ripple cross-lamination, and parallel lamination. | Lower intertidal sand flat to upper intertidal mud flat and tidal channels    | Cándana Quartzite (Spain)                                            | Tidal-flat deposits stacked forming fining-upward parasequences.                                                        | Crimes et al. (1977)                                                                                    |
| Cambrian Stages 3 to 4                 | <i>Diplichnites</i> isp., <i>Dimorphichnus</i> isp., <i>Rusophycus carbonarius</i>                                                                                                                                                                                                                                                                                | Heterolithic facies. Flaser and wavy bedding. Syneresis and desiccation cracks, wrinkle marks, current and wave ripple cross-lamination, interference ripples and mudstone intraclasts.                  | Lower intertidal sand flat to upper intertidal mud flat                       | Lake Oesa Member of the St Piran Formation                           | Tidal-flat deposition is associated with a forced regression.                                                           | Desjardins et al. (2012)                                                                                |
| Cambrian Stage 4 to Cambrian Series 3. | <i>Cruziana problematica</i> , <i>Diplichnites</i> isp., <i>Rusophycus carbonarius</i> , <i>R. leifeirikssoni</i> , <i>Rusophycus</i> isp.                                                                                                                                                                                                                        | Heterolithic facies. Flaser and wavy bedding. Syneresis cracks, wrinkle marks, current and wave ripple cross-lamination, ripple patches, interference ripples and flat-topped ripples.                   | Lower intertidal sand flat to middle intertidal mixed flat                    | Campanario Formation (Argentina)                                     | Tidal-flat deposits typically occur above subtidal sandbodies forming fining-upward parasequences.                      | Mángano & Buatois (2004)                                                                                |
| Cambrian Series 3                      | <i>Cruziana problematica</i> , <i>Diplichnites</i> isp., <i>Dimorphichnus</i> cf. <i>D. obliquus</i> , <i>Rusophycus carbonarius</i> , <i>Rusophycus</i> isp.                                                                                                                                                                                                     | Heterolithic facies. Wrinkle marks, current and wave ripple cross-lamination, and parallel lamination.                                                                                                   | Tidal flats interfingering with a braided delta                               | Haneh Member of the Burj Formation and Umm Ishrin Formation (Jordan) | Some of these ichnotaxa also occur in the underlying delta-front deposits. Stratal pattern indicates forced regression. | Selley (1970); Makhlof & Abed (1991); Amireh et al (1994); Hofmann et al. (2012); Mángano et al. (2013) |
| Cambrian Series 3                      | <i>Cruziana barbata</i> , <i>Rusophycus ramellensis</i>                                                                                                                                                                                                                                                                                                           | Heterolithic facies. Wavy and lenticular bedding. Herringbone cross-stratification., desiccation cracks, current and wave ripple cross-lamination, and parallel lamination.                              | Lower intertidal sand flat to middle intertidal mixed flat and tidal channels | Oville Sandstone and Shales (Spain)                                  | Bimodal-bipolar paleocurrents.                                                                                          | Legg (1985)                                                                                             |
| Cambrian Series 4                      | <i>Cruziana omanica</i> , <i>C. semiplicata</i> , <i>C. cf. tortworthi</i> , <i>Cruziana</i> isp., <i>Monomorphichnus bilinearis</i> ,                                                                                                                                                                                                                            | Heterolithic facies. Flaser, wavy and lenticular bedding. Herringbone cross-                                                                                                                             | Lower intertidal sand flat to shallow subtidal.                               | Pico de Halcón Member of the Santa Rosita Formation                  | Bimodal-bipolar paleocurrents.                                                                                          | Mángano et al. (1996)                                                                                   |

|                             |                                                                                                                                                                                                                                                                                                                                                                                                                                                                                                                                                                                                                                                                                                                          |                                                                                                                                                                                                                                                                                               |                                                                              |                                                       |                                                                                                                                                                      |                                             |
|-----------------------------|--------------------------------------------------------------------------------------------------------------------------------------------------------------------------------------------------------------------------------------------------------------------------------------------------------------------------------------------------------------------------------------------------------------------------------------------------------------------------------------------------------------------------------------------------------------------------------------------------------------------------------------------------------------------------------------------------------------------------|-----------------------------------------------------------------------------------------------------------------------------------------------------------------------------------------------------------------------------------------------------------------------------------------------|------------------------------------------------------------------------------|-------------------------------------------------------|----------------------------------------------------------------------------------------------------------------------------------------------------------------------|---------------------------------------------|
|                             | <i>Rusophycus carbonarius</i> , <i>R. latus</i> , <i>Rusophycus</i> isp.                                                                                                                                                                                                                                                                                                                                                                                                                                                                                                                                                                                                                                                 | stratification., planar cross-bedding, syneresis cracks, current and wave ripple cross-lamination., and parallel lamination.                                                                                                                                                                  |                                                                              | (Argentina)                                           |                                                                                                                                                                      |                                             |
| Cambrian Series 4 to Floian | <i>Cruziana furcifera</i> , <i>C. goldfussi</i> , <i>C. rugosa</i> , <i>C. semiplicata</i> , <i>Dimorphichnus</i> isp., <i>Diplichnites</i> isp., <i>Rusophycus</i> isp.                                                                                                                                                                                                                                                                                                                                                                                                                                                                                                                                                 | Heterolithic facies. Flaser, wavy and lenticular bedding. Current and wave ripple cross-lamination.                                                                                                                                                                                           | Middle intertidal mixed flat to upper intertidal mud flat and tidal channels | Cabo Series (Spain)                                   |                                                                                                                                                                      | Baldwin (1977)                              |
| Tremadocian to Floian       | <i>Cruziana barriosi</i> , <i>C. furcifera</i> , <i>C. goldfussi</i> , <i>C. rugosa</i> , <i>C. semiplicata</i> , <i>Rusophycus morgati</i> , <i>Rusophycus</i> isp.                                                                                                                                                                                                                                                                                                                                                                                                                                                                                                                                                     | Heterolithic facies. Flaser, bedding. Herringbone cross-stratification., current and wave ripple cross-lamination.                                                                                                                                                                            | Lower intertidal sand flat to upper intertidal mud flat and tidal channels   | Barrios Formation (Spain)                             | Tidal-flat deposits stacked forming fining-upward parasequences.                                                                                                     | Baldwin (1977)                              |
| Tremadocian to Floian       | <i>Cruziana billingsi</i> , <i>C. breadstoni</i> , <i>C. furcifera</i> , <i>C. goldfussi</i> , <i>C. problematica</i> , <i>C. rugosa</i> , <i>C. semiplicata</i> , <i>C. tortworthi</i> , <i>C. ispp.</i> , <i>Dimorphichnus obliquus</i> , <i>Diplichnites [Petalichnus]</i> ispp., <i>Monomorphichnus bilinearis</i> , <i>M. intersectus</i> , <i>M. lineatus</i> , <i>M. multilineatus</i> , <i>Monomorphichnus</i> isp., <i>Rusophycus biloba</i> , <i>R. crimesi</i> , <i>R. didymus</i> , <i>R. cf. dispar</i> , <i>R. eutendorfensis</i> , <i>R. latus</i> , <i>R. leifeiriksoni</i> , <i>R. morgati</i> , <i>R. cf. pedroanus</i> , <i>R. cf. pudicus</i> , <i>Rusophycus</i> ispp., <i>Trichophycus venosus</i> | Heterolithic facies. Flaser and wavy bedding. Herringbone cross-stratification, planar cross-bedding, flat-topped ripples, interference ripples, current ripples and ripple cross-lamination, scours, channels. Wrinkle marks, mudstone intraclasts, load casts, rill marks, and swash marks. | Lower intertidal sand flat to middle intertidal mixed flat                   | Beach, Ochre Cove and Power Steps formations (Canada) | Upper intertidal and supratidal flats are represented but contain no trilobite trace fossils. Heterolithic middle intertidal flats show the greatest ichnodiversity. | Fillion and Pickerill (1990)                |
| Floian to Darriwilian       | <i>Cruziana furcifera</i> , <i>C. goldfussi</i> , <i>C. rugosa</i> , <i>Dimorphichnus</i> isp.                                                                                                                                                                                                                                                                                                                                                                                                                                                                                                                                                                                                                           | Heterolithic facies. Flaser, wavy and lenticular bedding. Desiccation and syneresis cracks, planar cross-bedding, current and wave ripple cross-lamination, and interference ripples.                                                                                                         | Lower intertidal sand flat to upper intertidal mud flat                      | Mojotoro Formation (Argentina)                        | Tidal-flat deposits typically occur above subtidal sandbodies forming fining-upward parasequences.                                                                   | Mángano et al. (2001)                       |
| Floian to Darriwilian       | <i>C. bagnolensis</i> , <i>C. furcifera</i> , <i>C. lefebvrei</i> , <i>C. rugosa</i>                                                                                                                                                                                                                                                                                                                                                                                                                                                                                                                                                                                                                                     | Herringbone cross-stratification, reactivation surfaces, wrinkle marks and desiccation cracks.                                                                                                                                                                                                | Tidal flats                                                                  | Grès Armoricaín (France)                              |                                                                                                                                                                      | Durand (1985)                               |
| Katian                      | <i>Petalichnus</i> isp., <i>Taenidium barrretti</i>                                                                                                                                                                                                                                                                                                                                                                                                                                                                                                                                                                                                                                                                      | Siltstone and shale, desiccation cracks, mudstone drapes and mudstone intraclasts.                                                                                                                                                                                                            | Upper intertidal mud flat                                                    | Ringgold Member of the Sequatchie Formation (USA)     |                                                                                                                                                                      | Rindsberg (1983); Martin & Rindsberg (1999) |

Table DR1. Selected occurrences of trilobite trace fossils in lower Paleozoic intertidal deposits. *Monomorphichnus* isp., *Diplichnites* isp., *Rusophycus carbonarius* and *Cruziana problematica* are included in the list, but production by other arthropods cannot be completely ruled out. The degree of certainty in the environmental interpretations varies from case to case. However, only examples in which diagnostic structures of intertidal conditions were noted by the authors of each study are included in the table.

## References

- Amireh, B.S., Schneider, W., and Abed, A.M., 1994, Evolving Fluvial Transitional Marine Deposition through the Cambrian Sequence of Jordan: *Sedimentary Geology*, v. 89, p.65–90.
- Baldwin, C.T., 1977, The stratigraphy and facies associations of trace fossils in some Cambrian and Ordovician rocks of north western Spain; *in*, Crimes, T.P., and Harper, J.C., eds. *Trace Fossils 2: Geological Journal Special Issue*, v. 9, p. 9-40.
- Crimes, T. P., Legg, I., Marcos, A., and Arboleya, M., 1977, ?Late Precambrian-low Lower Cambrian trace fossils from Spain; *in*, Crimes, T.P., and Harper, J.C., eds. *Trace Fossils 2: Geological Journal Special Issue*, v. 9, p. 91-138.
- Desjardins, P.R., Buatois, L.A., Pratt, B.R., and Mángano, M.G., 2012, Forced-regressive tidal flats: Response to falling sea level in tide-dominated settings: *Journal of Sedimentary Research*, v. 82, p. 149-162.
- Durand, J., 1985, Le Gres Armoricaín. Sédimentologie-Traces fossils: Milieux de dépôt: Centre Armoricaín d'Étude structurale des Socles, *Mémoires et Documents*, v. 3, p. 1-150.
- Fillion, D., and Pickerill, R.K., 1990, Ichnology of the Lower Ordovician Bell Island and Wabana Groups of eastern Newfoundland: *Palaeontographica Canadiana*, v. 7, p. 1-119.
- Hofmann, R., Mángano, M.G., Elicki, O. , and Shinaq, R., 2012, Paleoecologic and biostratigraphic significance of trace fossils from shallow- to marginal-marine environments from the Middle Cambrian of Jordan: *Journal of Paleontology*, v. 86, p. 931-955.
- Legg, I.C., 1985, Trace fossils from a Middle Cambrian deltaic sequence, North Spain, *in*,

- Curran, H.A., ed., Biogenic Structures: Their use in interpreting depositional environments: Society of Economic Paleontologists and Mineralogists, Special Publication no. 35, p. 151-165.
- Makhlouf, I.M., and Abed, A.M., 1991, Depositional facies and environments in the Umm Ishrin Sandstone Formation, Dead Sea area, Jordan: *Sedimentary Geology*, v. 71, p. 177–187.
- Mángano, M.G., and Buatois, L.A., 2004a, Reconstructing early Phanerozoic intertidal ecosystems: Ichnology of the Cambrian Campanario Formation in northwest Argentina, *in*, Webby, B.D., Mángano, M.G., and Buatois, L.A., eds., *Trace Fossils in Evolutionary Palaeoecology: Fossils & Strata*, v. 51, p. 17–38.
- Mángano, M.G., Buatois, L.A., and Aceñolaza, G.F., 1996, Trace fossils and sedimentary facies from an Early Ordovician tide-dominated shelf (Santa Rosita Formation, northwest Argentina): Implications for ichnofacies models of shallow marine successions: *Ichnos*, v. 5, p. 53–88.
- Martin, A.J., and Rindsberg, A.K., 1999, Just what were those trilobites doing on the tidal flats? Meniscate burrows from the Upper Ordovician of the southern Appalachians [abs.]: *Geological Society of America, Abstracts with Papers*, v. 31, no. 3, p. A-28.
- Mángano, M.G., Buatois, L.A., and Moya, M.C., 2001, Trazas fósiles de trilobites de la Formación Mojotoro (Ordovícico inferior-medio de Salta, Argentina): Implicancias paleoecológicas, paleobiológicas y bioestratigráficas: *Revista Española de Paleontología*, v. 16, p. 9-28.
- Mángano, M.G., Buatois, L.A., Hofmann, R., Elicki, O., and Shinaq, R., 2013, Exploring the aftermath of the Cambrian Explosion: The evolutionary significance of marginal- to

shallow-marine ichnofaunas of Jordan: Palaeogeography, Palaeoclimatology,  
Palaeoecology, v. 374, p. 1-15.

Rindsberg, A.K., 1983, Ichnology and paleoecology of the Sequatchie and Red Mountain  
Formations (Ordovician-Silurian), Georgia-Tennessee: Unpublished M.S. thesis,  
University of Georgia, Athens, Georgia, 381 pp., 23 pl.

Selley, R.C., 1970. Ichnology of Paleozoic sandstones in the Southern Desert of Jordan: A study  
of trace fossils in their sedimentologic context. In: Crimes, T.P., Harper, J.C. (Eds.),  
Trace Fossils. Geological Journal Special Issue 3, 477-488.
